# Supplementary material for: Transcriptional Regulation of the Bovine Fatty Acid Transport Protein 1 Gene by Krüppel-Like Factors 15
Source: PubMed Central journal article supplement (PMC6769441; doi:10.3390/ani9090654), 2019-09-05
Supplement: animals-09-00654-s001.pdf [file animals-09-00654-s001.pdf]

**Table S1.****Primers used in the expression and functional analysis of the *SLC27A1* promoter**

| Reaction                  | primer                   | Primer sequence(5'-3')                               | Binding region | Size (bp) |
|---------------------------|--------------------------|------------------------------------------------------|----------------|-----------|
| qRT-PCR                   | FATP1 forward            | AAGAGCCTGGTCAAGTTCTG                                 | --             | 239       |
|                           | FATP1 reverse            | TAGGAGTAGTGCCCAAATGC                                 | --             | --        |
|                           | β-actin forward          | CATCGCAATGAGCGGTTCC                                  | --             | 147       |
|                           | β-actin reverse          | ACCGTGTGGCGTAGAGGTC                                  | --             | --        |
| Promoter cloning          | FATP1 promoter forward   | CTACTGTGGTGGGCACTTG                                  | -1856/-1837    | 2046      |
|                           | FATP1 promoter reverse   | TTGTTCCCTGGCTGACCTGGAG                               | +168/+190      | --        |
|                           | FATP1 promoter forward 1 | <b>GAGCTC</b> TACTGTGGTGGGCACTTG                     | -1856/-1837    | 2046      |
|                           | FATP1 promoter forward 2 | <b>GAGCTC</b> CAATGTGCAGAGGTGAGAG                    | -1558/-1540    | 1748      |
|                           | FATP1 promoter forward 3 | <b>GAGCTC</b> CGCTAGTGTTAAAGAACCTG                   | -1261/-1241    | 1451      |
|                           | FATP1 promoter forward 4 | <b>GAGCTC</b> TCCACTGGAGGAGTACTG                     | -955/-938      | 1145      |
|                           | FATP1 promoter forward 5 | <b>GAGCTC</b> AAGGCCACAGGATGGGAGGAGAAAG              | -640/-616      | 830       |
|                           | FATP1 promoter forward 6 | <b>GAGCTC</b> CGCAGAGTGCAAGCCTCAG                    | -387/-368      | 577       |
|                           | FATP1 promoter forward 7 | <b>GAGCTC</b> AGAGCTGAGAAGGTCGGCCAAG                 | -96/-75        | 286       |
|                           | FATP1 promoter reverse 1 | <b>CTCGAG</b> TGTTCCCTGGCTGACCTGGAG                  | +168/+190      | --        |
| 5'RACE                    | FATP1-GSP1               | GAAGTGGTCCGAGAACGGGTTGAGG                            | --             | 948       |
|                           | FATP1-GSP2               | CGCATAGTCGTGCTTTCCGGCTTC                             | --             | 531       |
| Site-directed mutagenesis | mKLF15 forward           | CCAAGCAGGAAAGAAACAAGCA <b>CC</b> GTGGGATAGGCAGGGGGG  | -79/-36        | 286       |
|                           | mKLF15 reverse           | CCCCCTGCCTATCCCAC <b>GG</b> GTGCTTGTTCCTTCTGCTTGG    | --             | --        |
|                           | mPPARγ forward           | GATAGGCAGGGGGC <b>ATTA</b> GTAGGGGAGCTTGAG           | -50/-15        | 286       |
|                           | mPPARγ reverse           | CTCCAAGCTCCCC <b>TA</b> ATGCCCTGCCTATC               | --             | --        |
| EMSA                      | KLF15 forward            | CCAAGCAGGAAAGAAACAAGCA <b>GGG</b> GTGGGATAGGCAGGGGGG | -79/-36        | 286       |
|                           | KLF15 reverse            | CCCCCTGCCTATCCA <b>CC</b> CTGCTTGTTCCTTCTGCTTGG      | --             | --        |
